# Supplementary material for: Disrupting upstream translation in mRNAs is associated with human disease
Source: PubMed Central journal article supplement (PMC7943595; doi:10.1038/s41467-021-21812-1), 2021-03-09
Supplement: 41467_2021_21812_MOESM1_ESM.pdf [file 41467_2021_21812_MOESM1_ESM.pdf]

**Supplementary Figures and Tables for Disrupting upstream translation in mRNAs is associated with loss-of-function in human disease**

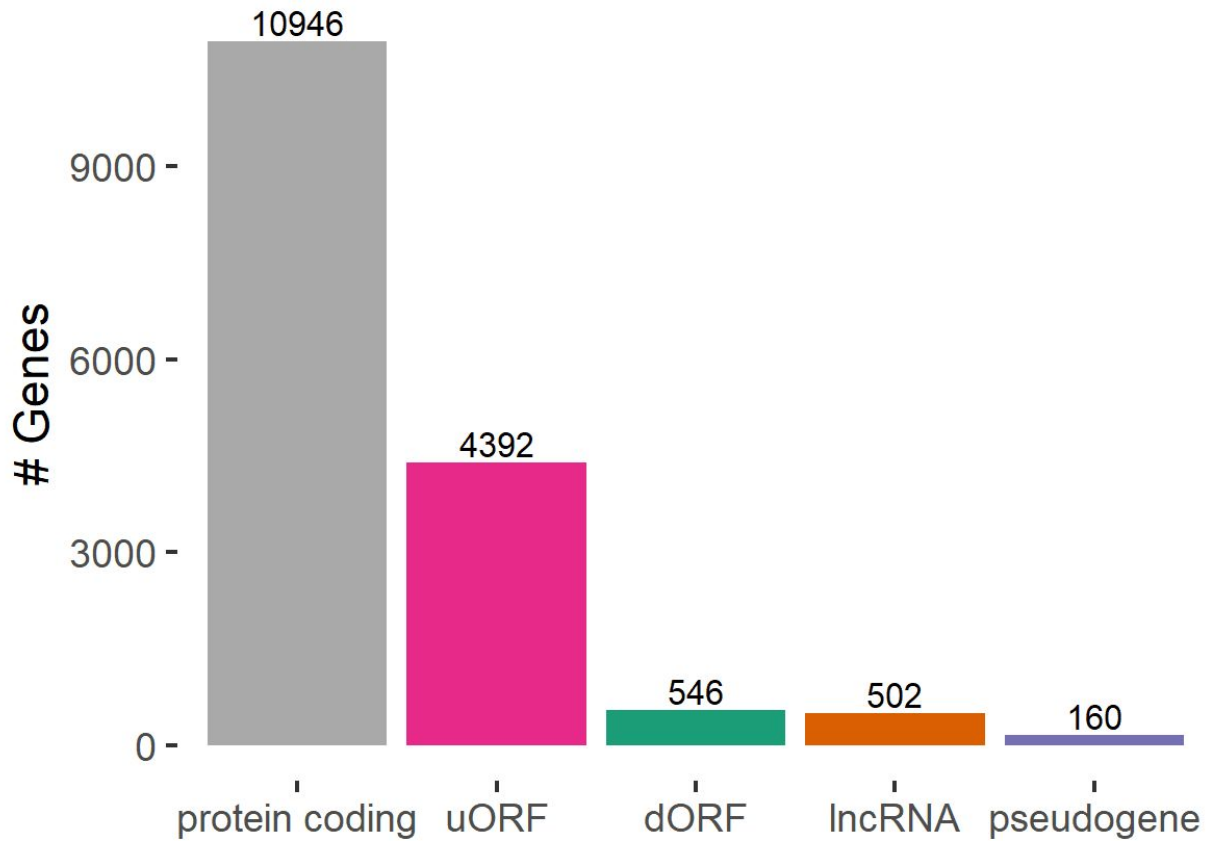

**Supplementary Figure 1:** Distribution of protein coding ORFs, uORFs, and other non-canonical ORFs mapped by ribosome profiling from Ji et. al paper<sup>16</sup>. dORFs represent ORFs mapped in 3'UTRs, lncRNAs represent ORFs mapped in long-noncoding RNAs, and pseudogenes represent translated pseudogenes respectively.

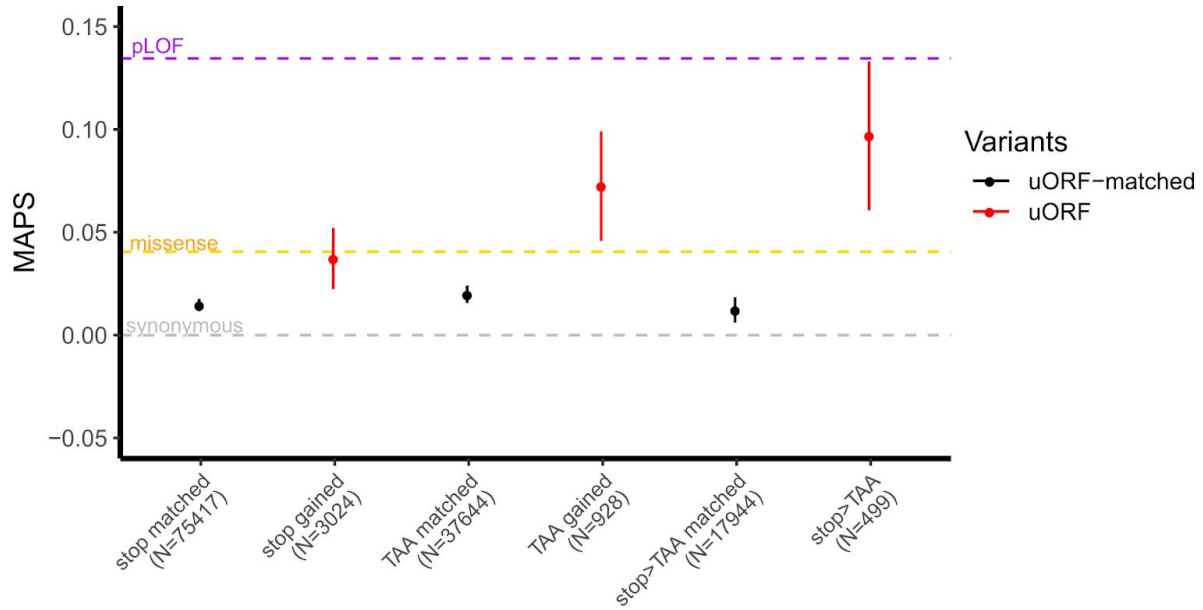

**Supplementary Fig. 2:** Points showing MAPS scores for uORF UTC-creating and stop-strengthening variants compared to non UTC-creating or stop-strengthening uORF variants matched by trinucleotide mutation context. Error bars represent bootstrapped 90% confidence intervals.

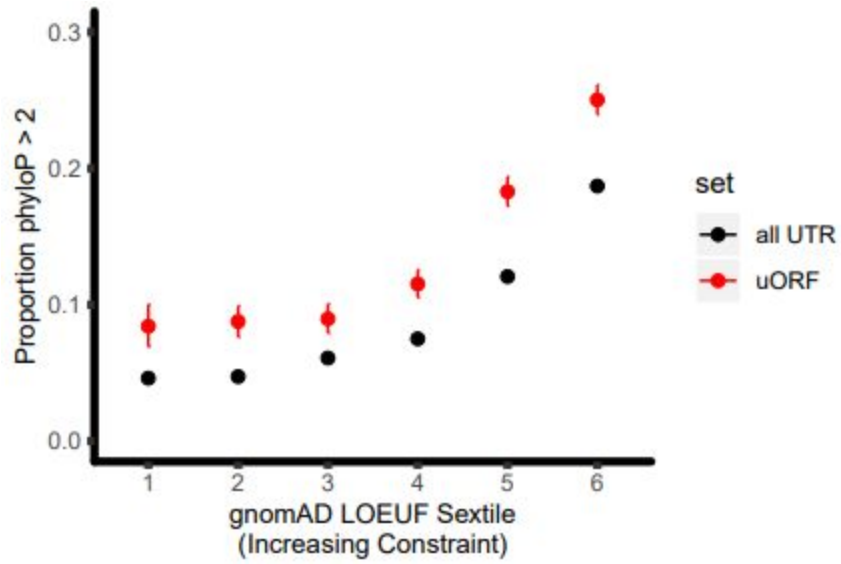

**Supplementary Fig. 3:** PhyloP scores for possible UTC-creating positions in translated uORFs (red) compared to 5'UTR sequences (black) across all sextiles of gene constraint as determined by gnomAD LOEUF scores (1 being least constrained, 6 being most constrained).

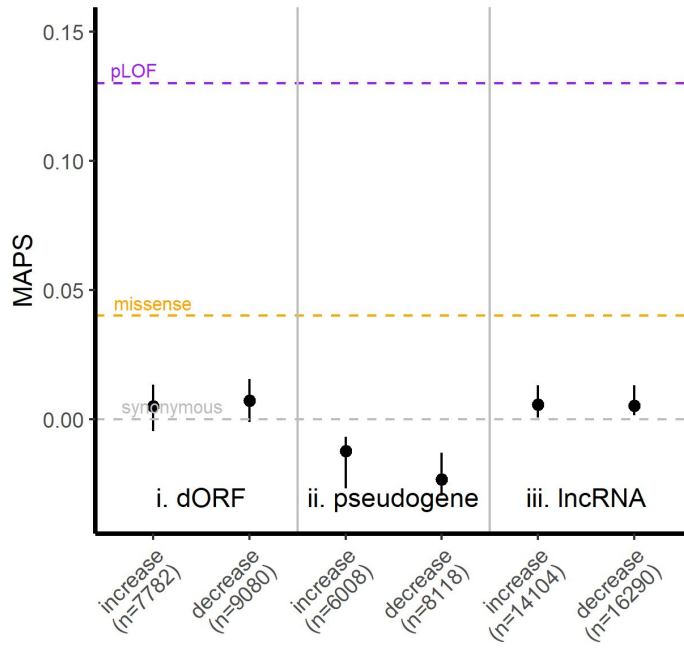

**Supplementary Fig. 4:** Optimality changing MAPS scores for SNVs in dORFs (3'UTRs), pseudogenes, and long-noncoding RNAs (lncRNAs). Error bars represent bootstrapped 90% confidence intervals.

a. CSC from 293 orfome library

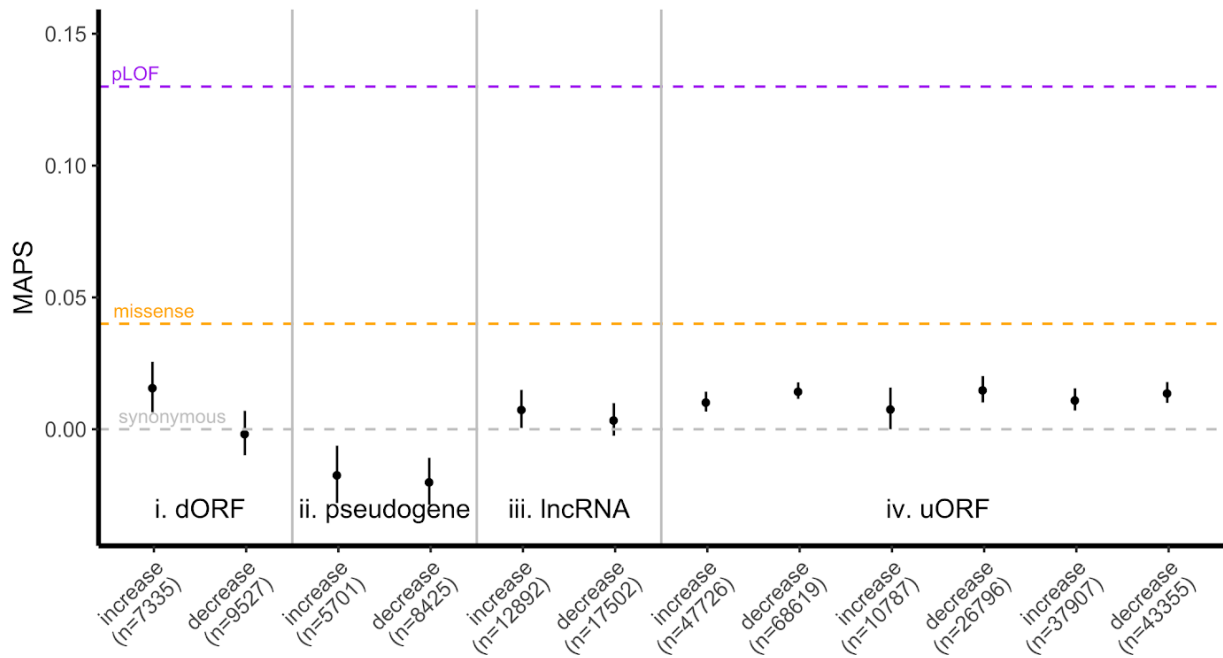

b. CSC from RPE endogenous mRNAs

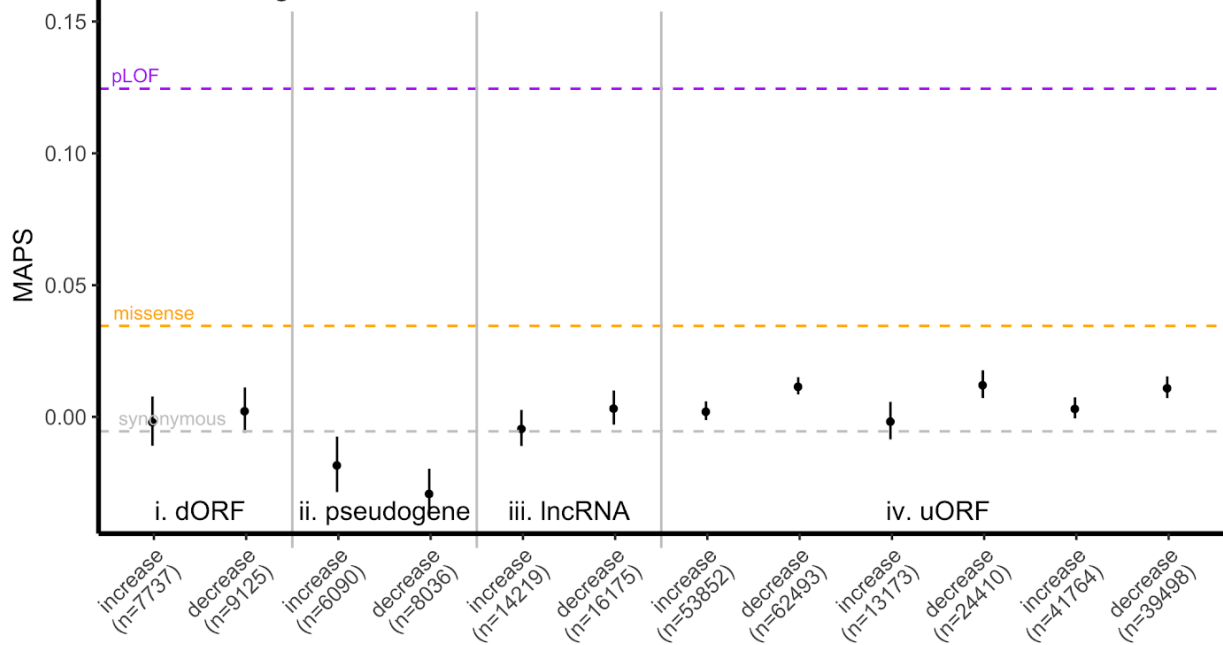

**Supplementary Fig. 5:** MAPS score dependence on whether a SNV increases or decreases codon optimality in uORFs is robust to changing CSC-scores used to calculate codon optimality across 293 cell lines using the orfome approach, and from retinal pigment epithelium cells with CSC-scores calculated using endogenous mRNAs<sup>35</sup>. Error bars represent bootstrapped 90% confidence intervals.

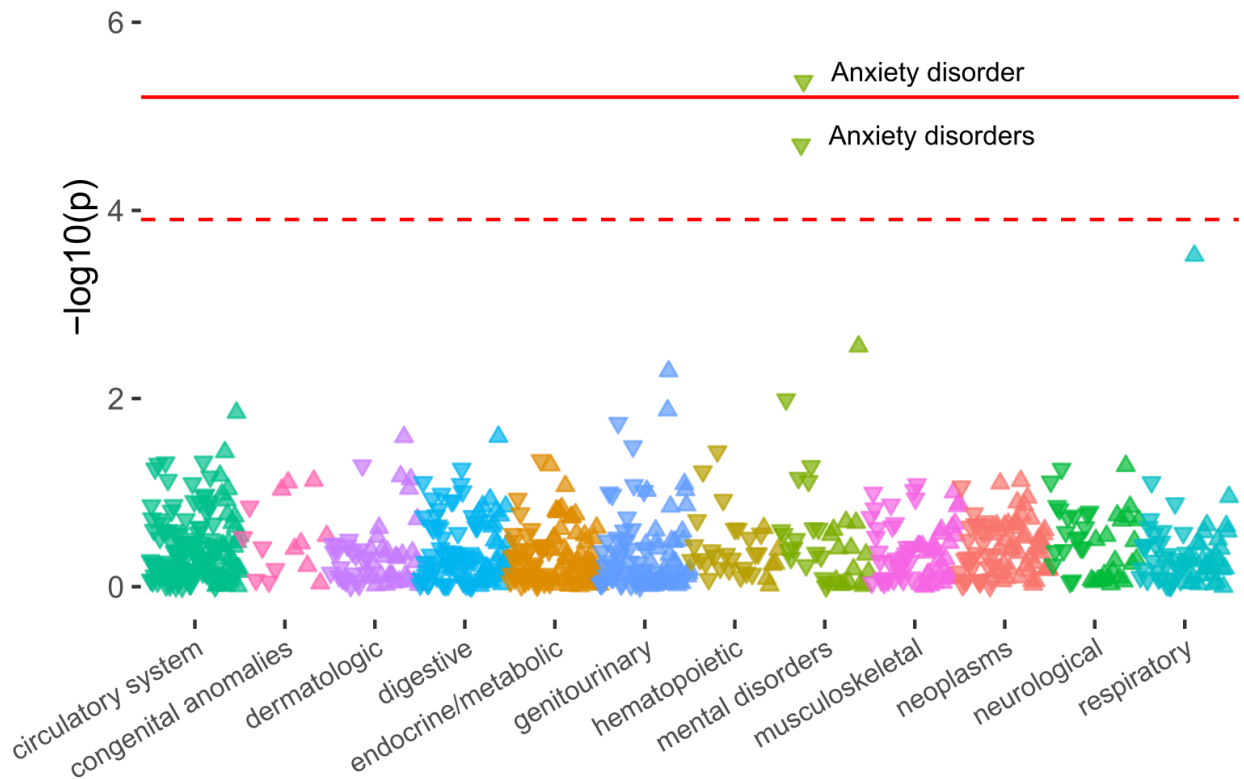

**Supplementary Figure 6:** PheWAS plot of *VPS53* stop-strengthening variant. The solid red line represents the threshold for Bonferroni-adjusted significance ( $P=6.25e-6$ ) and the red dashed line represents the FDR threshold ( $P=1.25e-4$ ) adjusted for multiple hypothesis testing. The direction of each arrowhead corresponds to increased risk (up) or decreased risk (down). P-values are derived from a logistic regression model. Red solid line indicates Bonferroni significance threshold ( $P=6.25e-05$ ). Red dashed line represents the FDR < 0.1 threshold.

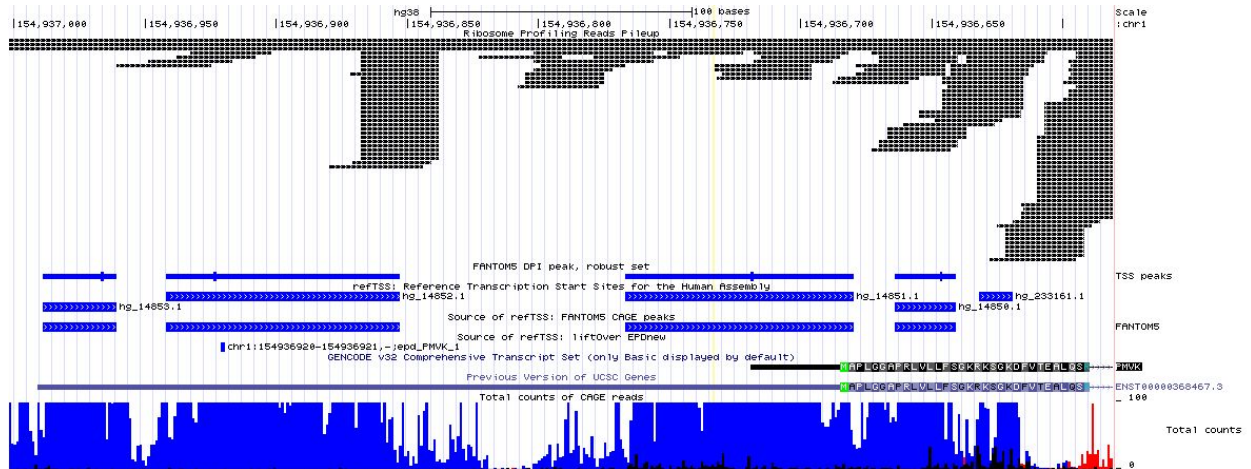

**Supplementary Figure 7:** Change in PMVK 5'UTR annotation as of September 2019 Gencode 32 release. The longer 5'UTR isoform for PMVK is supported by transcription start-site mapping from FANTOM5, and by the remapped ribosome-profiling reads (top, black) from [GSE65885](https://www.ncbi.nlm.nih.gov/geo/query/acc.cgi?acc=GSE65885).

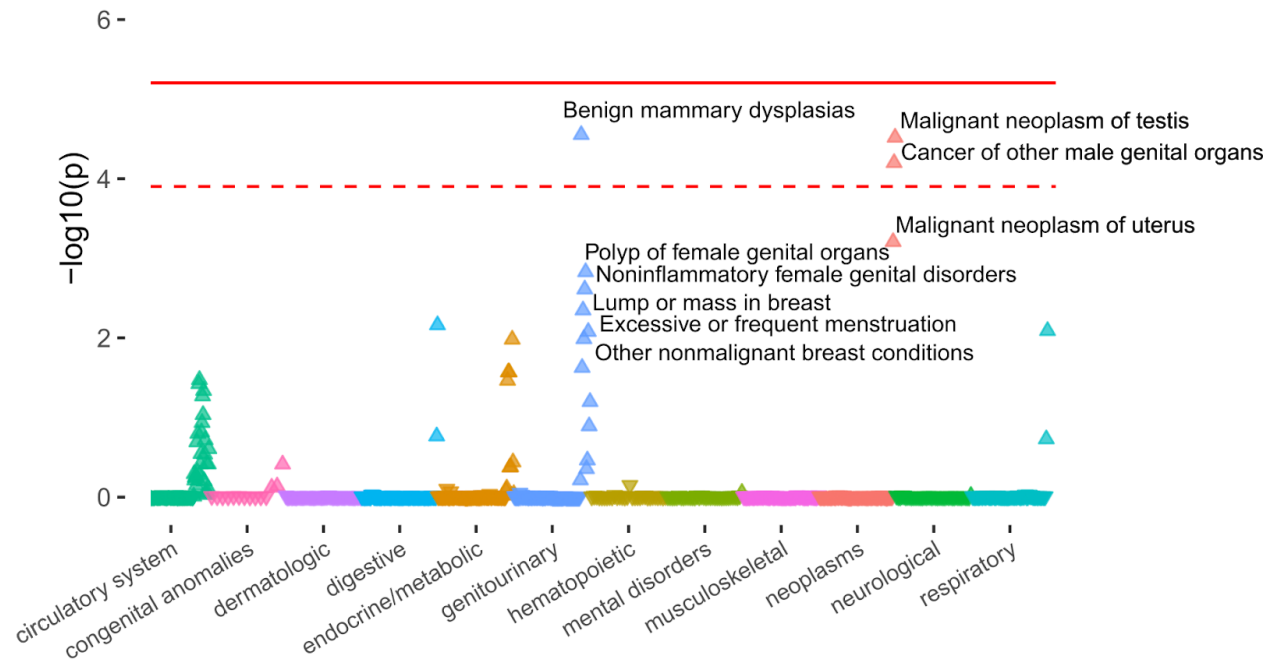

**Supplementary Figure 8:** PheWAS plot of *BCL2L13* stop-strengthening variant. The solid red line represents the threshold for Bonferroni-adjusted significance ( $P=6.25e-6$ ) and the red dashed line represents the FDR threshold ( $P=1.25e-4$ ) adjusted for multiple hypothesis testing. The direction of each arrowhead corresponds to increased risk (up) or decreased risk (down). P-values are derived from a logistic regression model. Red solid line indicates Bonferroni significance threshold ( $P=6.25e-05$ ). Red dashed line represents the FDR < 0.1 threshold.



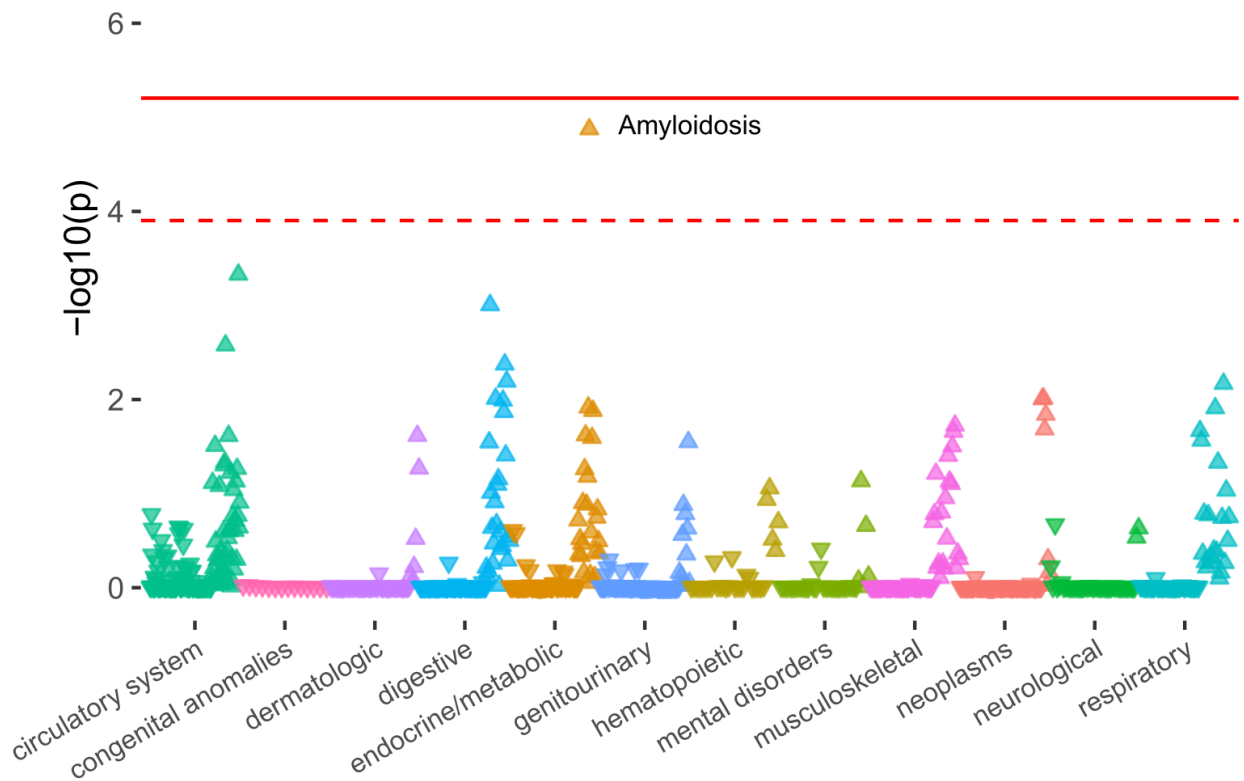

**Supplementary Figure 9:** PheWAS plot of *NALCN* UAA UTC variant. The solid red line represents the threshold for Bonferroni-adjusted significance ( $P=6.25e-6$ ) and the red dashed line represents the FDR threshold ( $P=1.25e-4$ ) adjusted for multiple hypothesis testing. The direction of each arrowhead corresponds to increased risk (up) or decreased risk (down). P-values are derived from a logistic regression model. Red solid line indicates Bonferroni significance threshold ( $P=6.25e-05$ ). Red dashed line represents the FDR < 0.1 threshold.

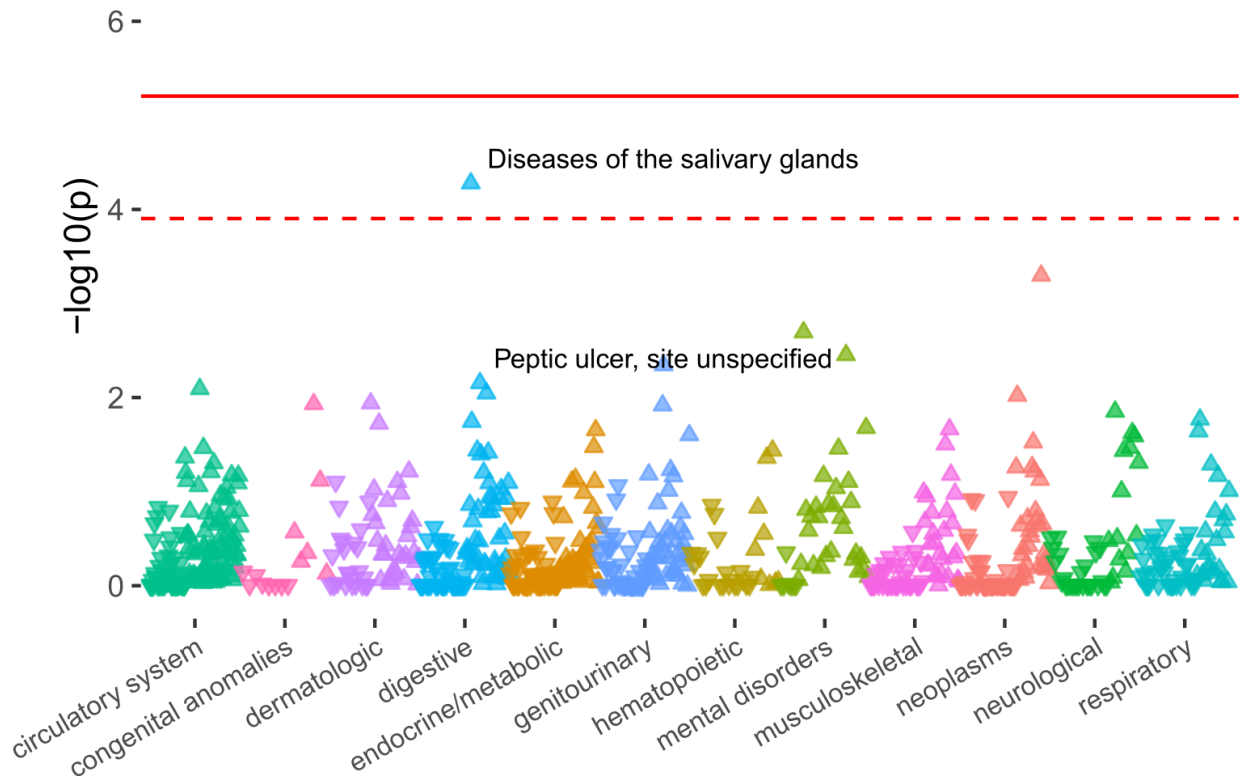

**Supplementary Figure 10:** PheWAS plot of *SHMT2* stop-strengthening variant. The solid red line represents the threshold for Bonferroni-adjusted significance ( $P=6.25 \times 10^{-6}$ ) and the red dashed line represents the FDR threshold ( $P=1.25 \times 10^{-4}$ ) adjusted for multiple hypothesis testing. The direction of each arrowhead corresponds to increased risk (up) or decreased risk (down). P-values are derived from a logistic regression model. Red solid line indicates Bonferroni significance threshold ( $P=6.25 \times 10^{-5}$ ). Red dashed line represents the FDR < 0.1 threshold.

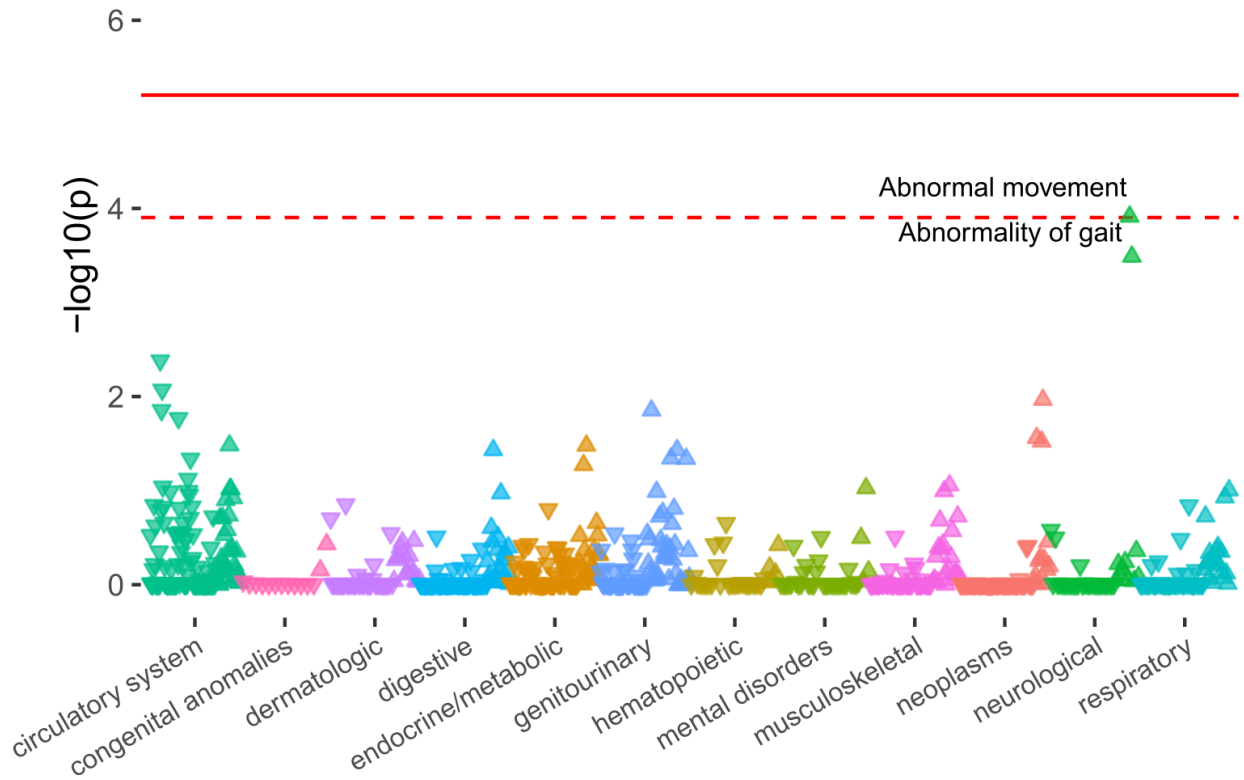

**Supplementary Figure 11:** PheWAS plot of *MOAP1* UAA UTC variant. The solid red line represents the threshold for Bonferroni-adjusted significance ( $P=6.25e-6$ ) and the red dashed line represents the FDR threshold ( $P=1.25e-4$ ) adjusted for multiple hypothesis testing. The direction of each arrowhead corresponds to increased risk (up) or decreased risk (down). P-values are derived from a logistic regression model. Red solid line indicates Bonferroni significance threshold ( $P=6.25e-05$ ). Red dashed line represents the FDR < 0.1 threshold.

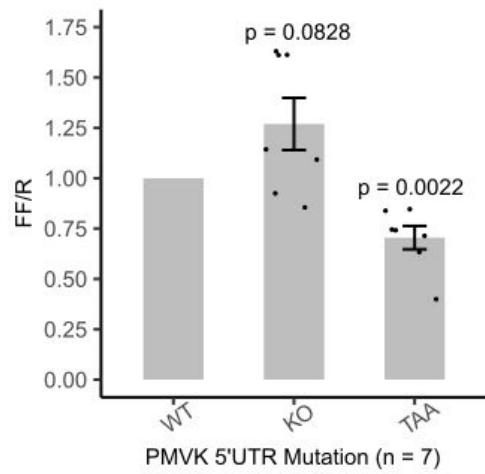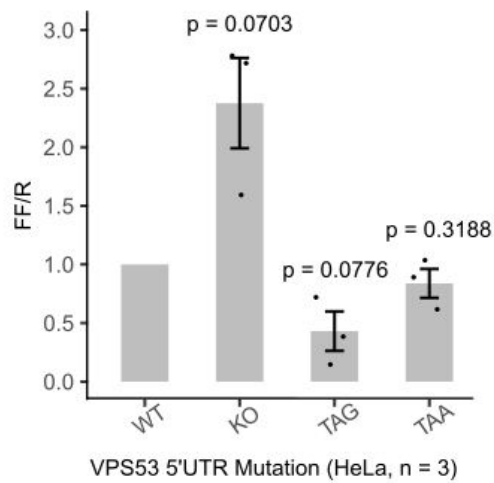

**Supplementary Figure 12:** Luciferase experiments for *PMVK* and *VPS53* plasmid Constructs showing similar direction of effect for UTC and stop-strengthening variants using HeLa cells for transfection. Results displayed are from independent biological replicates. P-values from one-sample T-test for each condition are displayed above each column. Error bars represent standard error of the mean. Source data are included in the Source Data file.

**Supplementary Table 1: uORF UTC / Stop-strengthening MAPS analysis with all CDS-overlapping variants removed.**

| <b>uORF Variant Type</b> | <b>Number of SNVs</b> | <b>SNVs overlapping any CDS (%)</b> | <b>Original MAPS (95% CI)</b> | <b>MAPS with CDS-overlap removed (95% CI)</b> |
|--------------------------|-----------------------|-------------------------------------|-------------------------------|-----------------------------------------------|
| UTC                      | 3024                  | 163 (5.39%)                         | 0.0373<br>(0.0194-0.0552)     | 0.0362<br>(0.0172-0.0552)                     |
| TAA gained               | 928                   | 93 (10.02%)                         | 0.0726<br>(0.0407-0.1045)     | 0.0765<br>(0.0430-0.1101)                     |
| Stop > TAA               | 499                   | 51 (10.22%)                         | 0.0971<br>(0.0537-0.1404)     | 0.1051<br>(0.0595-0.1507)                     |

**Supplementary Table 2: Relative frequencies of TGA, TAG, and UAA trinucleotides across different 5'UTR sequence contexts**

| Trinucleotide | Context        | Proportion | 2.5% quantile | 97.5% quantile |
|---------------|----------------|------------|---------------|----------------|
| UAA           | All 5'UTRs     | 0.354813   | 0.347512      | 0.362177       |
| UAA           | 5'UTRs w/ uORF | 0.375554   | 0.355256      | 0.396686       |
| UAA           | uORF           | 0.196608   | 0.17912       | 0.214626       |
| UAG           | All 5'UTRs     | 0.227442   | 0.221035      | 0.233975       |
| UAG           | 5'UTRs w/ uORF | 0.229501   | 0.211289      | 0.248058       |
| UAG           | uORF           | 0.285639   | 0.265501      | 0.305776       |
| UGA           | All 5'UTRs     | 0.417745   | 0.410151      | 0.425083       |
| UGA           | 5'UTRs w/ uORF | 0.394945   | 0.3739        | 0.415847       |
| UGA           | uORF           | 0.517753   | 0.495495      | 0.540541       |

**Supplementary Table 3: Minor allele frequencies for all PheWAS-significant variants tested in discovery and replication analyses**

| Gene    | Carrier Freq (PMBB) | PMBB EUR | PMBB AFR | Carrier Freq (UKB) | LOF Allele Freq. (PMBB) | LOF Allele Freq. (UKB) |
|---------|---------------------|----------|----------|--------------------|-------------------------|------------------------|
| PMVK    | 0.00298             | 0.00336  | 0.00000  | 0.00324            | 0.00086                 | 0.00094                |
| VPS53   | 0.09468             | 0.10954  | 0.01940  | 0.14370            | 0.00131                 | 0.00109                |
| NALCN   | 0.00147             | 0.00129  | 0.00106  | 0.00084            | 0.00122                 | 0.00162                |
| BCL2L13 | 0.00028             | 0.00039  | 0.00190  | 0.00029            | 0.00028                 | 0.00025                |
| SHMT2   | 0.01266             | 0.00540  | 0.03715  | 0.00749            | 0.00182                 | 0.00033                |
| MOAP1   | 0.00188             | 0.00006  | 0.00793  | N/A                | 0.00026                 | N/A                    |

**Supplementary Table 4: PheWAS replication analyses phenotypes tested**

| Variant     | Gene    | PheCode | Cases (UKB) | Controls (UKB) | Cases (PMBB) | Controls (PMBB) | Single Variant |              | pLoF Gene Burden |              |          |               |
|-------------|---------|---------|-------------|----------------|--------------|-----------------|----------------|--------------|------------------|--------------|----------|---------------|
|             |         |         |             |                |              |                 | OR (UKB)       | Rep. P (UKB) | OR (UKB)         | Rep. P (UKB) | OR PMBB  | Rep. P (PMBB) |
| rs181302437 | PMVK    | 250.13  | 33          | 32689          | 23           | 5198            | 3.3E-06        | 0.986        | 15.82            | 0.0073       | 2.46E-05 | 0.9887        |
| rs181302437 | PMVK    | 250.14  | 13          | 32689          | 25           | 5198            | N/A            | N/A          | N/A              | N/A          | 2.48E-05 | 0.989         |
| rs181302437 | PMVK    | 250.22  | 11          | 32689          | 315          | 6134            | N/A            | N/A          | N/A              | N/A          | 5.96E-05 | 0.9672        |
| rs35915949  | VPS53   | 300.1   | 627         | 31247          | 1060         | 6939            | 0.88           | 0.1631       | 1.35             | 0.6751       | 1        | 0.8052        |
| rs35915949  | VPS53   | 300     | 684         | 31247          | 1249         | 6939            | 0.88           | 0.1757       | 1.48             | 0.5833       | 1        | 0.5808        |
| rs139848407 | NALCN   | 270.33  | 11          | 34565          | 30           | 7727            | N/A            | N/A          | N/A              | N/A          | 7.25E-06 | 0.9892        |
| rs139848407 | NALCN   | 270     | 34          | 34554          | 134          | 9594            | 9.35E-06       | 0.9887       | 9.74             | 0.0264       | 4.42     | 0.1518        |
| rs140799351 | BCL2L13 | 610     | 277         | 33848          | 55           | 7689            | 1.77E-04       | 0.973        | N/A              | N/A          | N/A      | N/A           |
| rs140799351 | BCL2L13 | 187     | 51          | 33957          | 26           | 7700            | 56.02          | 0.0003       | N/A              | N/A          | N/A      | N/A           |
| rs140799351 | BCL2L13 | 187.2   | 30          | 33957          | 34           | 7700            | 79.78          | 0.0002       | N/A              | N/A          | N/A      | N/A           |
| rs28365863  | SHMT2   | 527     | N/A         | N/A            | 90           | 9774            | N/A            | N/A          | N/A              | N/A          | 2        | 0.0055        |
| rs116450723 | MOAP1   | 350     | N/A         | N/A            | 362          | 9415            | N/A            | N/A          | N/A              | N/A          | 2.35E-05 | 0.9659        |

**Supplementary Table 5: 5'UTR Fragments used in expression constructs**

| Gene (Transcript)                                   | Mutation | Sequence                                                                                                                                                                                                                                                                                                                                                                                                                                                                                                        |
|-----------------------------------------------------|----------|-----------------------------------------------------------------------------------------------------------------------------------------------------------------------------------------------------------------------------------------------------------------------------------------------------------------------------------------------------------------------------------------------------------------------------------------------------------------------------------------------------------------|
| <i>PMVK</i><br>( <a href="#">ENST00000368467</a> )  | WT       | TATAGGGAGACCCAAGCTGGCTAGTTAAGCTTAGATCTTGA<br>TATCCTCGAGAGAAGGTTCTGGGCGGGGCTGGACTGTTCTA<br>AGTGAGTTCGGGTGGGGGAGCTTCACGAGGGGAGGCTGCT<br>CTGTGAAGGAACCGCCTTTCTCTCCGCGTGTCTCACCCTTT<br>TCTCCCATATCTGTTTGGACATGAGCTGAGGGCACGGTCG<br>CGGGCGGTTCAGCCCTGTTTCGAGCTACGGCGAGGAGGGG<br>CGCGATTGTTCTTGTGTTGCCGCTCCGCTTAGTGGCCGCGTC<br>CATTCCGCGCGGTGTCCCGATTTTAGGGGTAGGGAGAAGT<br>GTCAGCTTCAGGCATCGCGAGGCGTGGCGGCCCCATGGAA<br>GATGCCAAAAACATTAAGAAGGGCCCAGCGCCATTCTACCC<br>ACTCGAAGACGGGACCGCCGGCGAGCAGCTGCACAAAGCC<br>ATGA  |
| <i>PMVK</i><br>( <a href="#">ENST00000368467</a> )  | KO       | TATAGGGAGACCCAAGCTGGCTAGTTAAGCTTAGATCTTGA<br>TATCCTCGAGAGAAGGTTCTGGGCGGGGCTGGACTGTTCTA<br>AGTGAGTTCGGGTGGGGGAGCTTCACGAGGGGAGGCTGCT<br>CTGTGAAGGAACCGCCTTTCTCTCCGCGTGTCTCACCCTTT<br>TCTCCCATATCTGTTTGGACATGAGCTGAGGGCACGGTCG<br>CGGGCGGTTCAGCCCTGTTTCGAGCTACGGCGAGGAGGGG<br>CGCGATTGTTCTTGTGTTGCCGCTCCGCTTAGTGGCCGCGTC<br>CATTCCGCGCGGTTTCCCGATTTTAGGGGTAGGGAGAAGTG<br>TCAGCTTCAGGCATCGCGAGGCGTGGCGGCCCCATGGAA<br>ATGCCAAAAACATTAAGAAGGGCCCAGCGCCATTCTACCCA<br>CTCGAAGACGGGACCGCCGGCGAGCAGCTGCACAAAGCCA<br>TGA   |
| <i>PMVK</i><br>( <a href="#">ENST00000368467</a> )  | TAG>TAA  | TATAGGGAGACCCAAGCTGGCTAGTTAAGCTTAGATCTTGA<br>TATCCTCGAGAGAAGGTTCTGGGCGGGGCTGGACTGTTCTA<br>AGTGAGTTCGGGTGGGGGAGCTTCACGAGGGGAGGCTGCT<br>CTGTGAAGGAACCGCCTTTCTCTCCGCGTGTCTCACCCTTT<br>TCTCCCATATCTGTTTGGACATGAGCTGAGGGCACGGTCG<br>CGGGCGGTTCAGCCCTGTTTCGAGCTACGGCGAGGAGGGG<br>CGCGATTGTTCTTGTGTTGCCGCTCCGCTTAGTGGCCGCGTC<br>CATTCCGCGCGGTGTCCCGATTTAAAGGGGTAGGGAGAAGT<br>GTCAGCTTCAGGCATCGCGAGGCGTGGCGGCCCCATGGAA<br>GATGCCAAAAACATTAAGAAGGGCCCAGCGCCATTCTACCC<br>ACTCGAAGACGGGACCGCCGGCGAGCAGCTGCACAAAGCC<br>ATGA |
| <i>VPS53</i><br>( <a href="#">ENST00000437048</a> ) | WT       | TATAGGGAGACCCAAGCTGGCTAGTTAAGCTTAGATCTTGA<br>TATCCTCGAGACTGGGGCCTGGGTGGCGGCTGGAGGCCTG<br>AGTTGGGCTCGCGGCGGGGTCGGCAGGGGGCCGGGTGG<br>CGGAATGGAAGATGCCAAAAACATTAAGAAGGGCCCAGCG<br>CCATTCTACCCACTCGAAGACGGGACCGCCGGCGAGCAGC<br>TGCACAAAGCCATGA                                                                                                                                                                                                                                                                      |



|                                                      |                   |                                                                                                                                                                                                                                                                                                                                                                                                                                                                                                                                                                        |
|------------------------------------------------------|-------------------|------------------------------------------------------------------------------------------------------------------------------------------------------------------------------------------------------------------------------------------------------------------------------------------------------------------------------------------------------------------------------------------------------------------------------------------------------------------------------------------------------------------------------------------------------------------------|
| <p>VPS53<br/>(<a href="#">ENST00000437048</a>)</p>   | <p>KO</p>         | <p>TATAGGGAGACCCAAGCTGGCTAGTTAAGCTTAGATCTTGA<br/>TATCCTCGAGA<b>CAG</b>GGGCCTGGGTGGCGGCTGGAGGCCTG<br/>AGTTGGGCTCGCGGCGGGGGTTCGGCAGGGGGCCGGGTGG<br/>CGGAATGGAAGATGCCAAAAACATTAAGAAGGGCCCAGCG<br/>CCATTCTACCCACTCGAAGACGGGACCGCCGGCGAGCAGC<br/>TGCACAAAGCCATGA</p>                                                                                                                                                                                                                                                                                                        |
| <p>VPS53<br/>(<a href="#">ENST00000437048</a>)</p>   | <p>TGA&gt;TAA</p> | <p>TATAGGGAGACCCAAGCTGGCTAGTTAAGCTTAGATCTTGA<br/>TATCCTCGAGACTGGGGCCTGGGTGGCGGCTGGAGGCCT<b>TA</b><br/><b>A</b>GTTGGGCTCGCGGCGGGGGTTCGGCAGGGGGCCGGGTGG<br/>CGGAATGGAAGATGCCAAAAACATTAAGAAGGGCCCAGCG<br/>CCATTCTACCCACTCGAAGACGGGACCGCCGGCGAGCAGC<br/>TGCACAAAGCCATGA</p>                                                                                                                                                                                                                                                                                                |
| <p>VPS53<br/>(<a href="#">ENST00000437048</a>)</p>   | <p>TGG&gt;TAG</p> | <p>TATAGGGAGACCCAAGCTGGCTAGTTAAGCTTAGATCTTGA<br/>TATCCTCGAGACTGGGGCCTGGG<b>TAG</b>CGGCTGGAGGCCTG<br/>AGTTGGGCTCGCGGCGGGGGTTCGGCAGGGGGCCGGGTGG<br/>CGGAATGGAAGATGCCAAAAACATTAAGAAGGGCCCAGCG<br/>CCATTCTACCCACTCGAAGACGGGACCGCCGGCGAGCAGC<br/>TGCACAAAGCCATGA</p>                                                                                                                                                                                                                                                                                                        |
| <p>BCL2L13<br/>(<a href="#">ENST00000543133</a>)</p> | <p>WT</p>         | <p>TCGGAGCACTCACCGCCGCTGGGGGACCCTGTCGGAAGCA<br/>ACTGCCGCCGCCGCCTCTTTTCATCTCTTCTGGGGCAGGGG<br/>CCAGGGCCAGGTTTTACACATCCATAAGTAGACCTTTTTGG<br/>AGCCTCACCAGCCAATTCA<b>ATGGCGTCCTCTTCTACTGTGC</b><br/><b>CT</b><br/>CTGGGATTTCACTATGAAACAAAGTATGTTGTTCTCAGCTAC<br/>TTGGGACTCCTCTCTCAAGAGAAGCTGCAAGAGCAACATCT<br/>TTCCTCACCCCAAGGGGTTCAACTAGATATAGCTTCACAATC<br/>TCTGGATCAAGAAATTTTATTAAGGTTAAACTGAAATTGAA<br/>GAAGAGCTAAAATCTCTGGACAAAGAAATTTCTGAAGGCCA<br/>GTGACATATCAGGCATTTTCGGGAATGTACACTGGAGACCAC<br/>AGTTCATGCCAGCGGCTGGAATAAGATTTTGGTGCCTCTGG<br/>TTTTGCTACGACAA</p> |
| <p>BCL2L13<br/>(<a href="#">ENST00000543133</a>)</p> | <p>ATG&gt;ATA</p> | <p>TCGGAGCACTCACCGCCGCTGGGGGACCCTGTCGGAAGCA<br/>ACTGCCGCCGCCGCCTCTTTTCATCTCTTCTGGGGCAGGGG<br/>CCAGGGCCAGGTTTTACACATCCATAAGTAGACCTTTTTGG<br/>AGCCTCACCAGCCAATTCA<b>ATA</b>GCCTCCTCTTCTACTGTGC<br/><b>CT</b><br/>CTGGGATTTCACTATGAAACAAAGTATGTTGTTCTCAGCTAC<br/>TTGGGACTCCTCTCTCAAGAGAAGCTGCAAGAGCAACATCT<br/>TTCCTCACCCCAAGGGGTTCAACTAGATATAGCTTCACAATC<br/>TCTGGATCAAGAAATTTTATTAAGGTTAAACTGAAATTGAA<br/>GAAGAGCTAAAATCTCTGGACAAAGAAATTTCTGAAGGCCA<br/>GTGACATATCAGGCATTTTCGGGAATGTACACTGGAGACCAC<br/>AGTTCATGCCAGCGGCTGGAATAAGATTTTGGTGCCTCTGG<br/>TTTTGCTACGACAA</p> |
| <p>BCL2L13</p>                                       | <p>TGA&gt;TAA</p> | <p>TCGGAGCACTCACCGCCGCTGGGGGACCCTGTCGGAAGCA</p>                                                                                                                                                                                                                                                                                                                                                                                                                                                                                                                        |

|                                   |                                                                                                                                                                                                                                                                                                                                                                                                                                                                                                                            |
|-----------------------------------|----------------------------------------------------------------------------------------------------------------------------------------------------------------------------------------------------------------------------------------------------------------------------------------------------------------------------------------------------------------------------------------------------------------------------------------------------------------------------------------------------------------------------|
| <a href="#">(ENST00000543133)</a> | <p>ACTGCCGCCGCCGCCTCTTTTCATCTCTTCTGGGGCAGGGG<br/> CCAGGGCCAGGTTTTACACATCCATAAGTAGACCTTTTTGG<br/> AGCCTCACCAGCCAATTCAATGGCGTCCTCTTCTACTGTGC<br/> CT<br/> CTGGGATTTCACTATGAAACAAAGTATGTTGTTCTCAGCTAC<br/> TTGGGACTCCTCTCTCAAGAGAAGCTGCAAGAGCAACATCT<br/> TTCCTCACCCCAAGGGGTTCAACTAGATATAGCTTCACAATC<br/> TCTGGATCAAGAAATTTTATTAAGTAAAGTAAACTGAAATTGAA<br/> GAAGAGCTAAAATCTCTGGACAAAGAAATTTCTGAAGGCCA<br/> GTAA CATATCAGGCATTTTCGGGAATGTACACTGGAGACCAC<br/> AGTTCATGCCAGCGGCTGGAATAAGATTTTGGTGCCTCTGG<br/> TTTTGCTACGACAA</p> |
|-----------------------------------|----------------------------------------------------------------------------------------------------------------------------------------------------------------------------------------------------------------------------------------------------------------------------------------------------------------------------------------------------------------------------------------------------------------------------------------------------------------------------------------------------------------------------|

**Supplementary Table 6: Nominal cardiac and movement disorder associations with SHMT2 stop-strengthening variant uncovered through PheWAS in Penn Medicine Biobank.**

| phenotype | beta  | OR    | SE    | p      | n_total | n_cases | n_controls | allele_freq | description                                                          |
|-----------|-------|-------|-------|--------|---------|---------|------------|-------------|----------------------------------------------------------------------|
| 747.13    | 1.518 | 4.561 | 0.602 | 0.0117 | 7300    | 62      | 7238       | 0.005410959 | Congenital anomalies of great vessels                                |
| 350.1     | 1.124 | 3.077 | 0.497 | 0.0238 | 9519    | 104     | 9415       | 0.011503309 | Abnormal involuntary movements                                       |
| 350.2     | 0.660 | 1.935 | 0.296 | 0.0258 | 9626    | 211     | 9415       | 0.011790983 | Abnormality of gait                                                  |
| 426.22    | 1.635 | 5.129 | 0.773 | 0.0343 | 2481    | 50      | 2431       | 0.005441354 | Mobitz II AV block                                                   |
| 972.1     | 1.434 | 4.197 | 0.703 | 0.0412 | 6285    | 40      | 6245       | 0.005966587 | Cardiac rhythm regulators causing adverse effects in therapeutic use |
| 427.5     | 0.859 | 2.362 | 0.438 | 0.0498 | 3412    | 157     | 3255       | 0.013335287 | Arrhythmia (cardiac) NOS                                             |

**Supplementary Data 1: Spreadsheet detailing all potential uORF stop creating positions identified in this analysis.**

Supplementary Data 1 is provided as a text file accessible at <https://doi.org/10.5281/zenodo.4536050><sup>71</sup>
